# Supplementary material
Source: PubMed Central journal article supplement (PMC7550072)

Average expression ( $\log_2(\text{TPM}+1)$ )

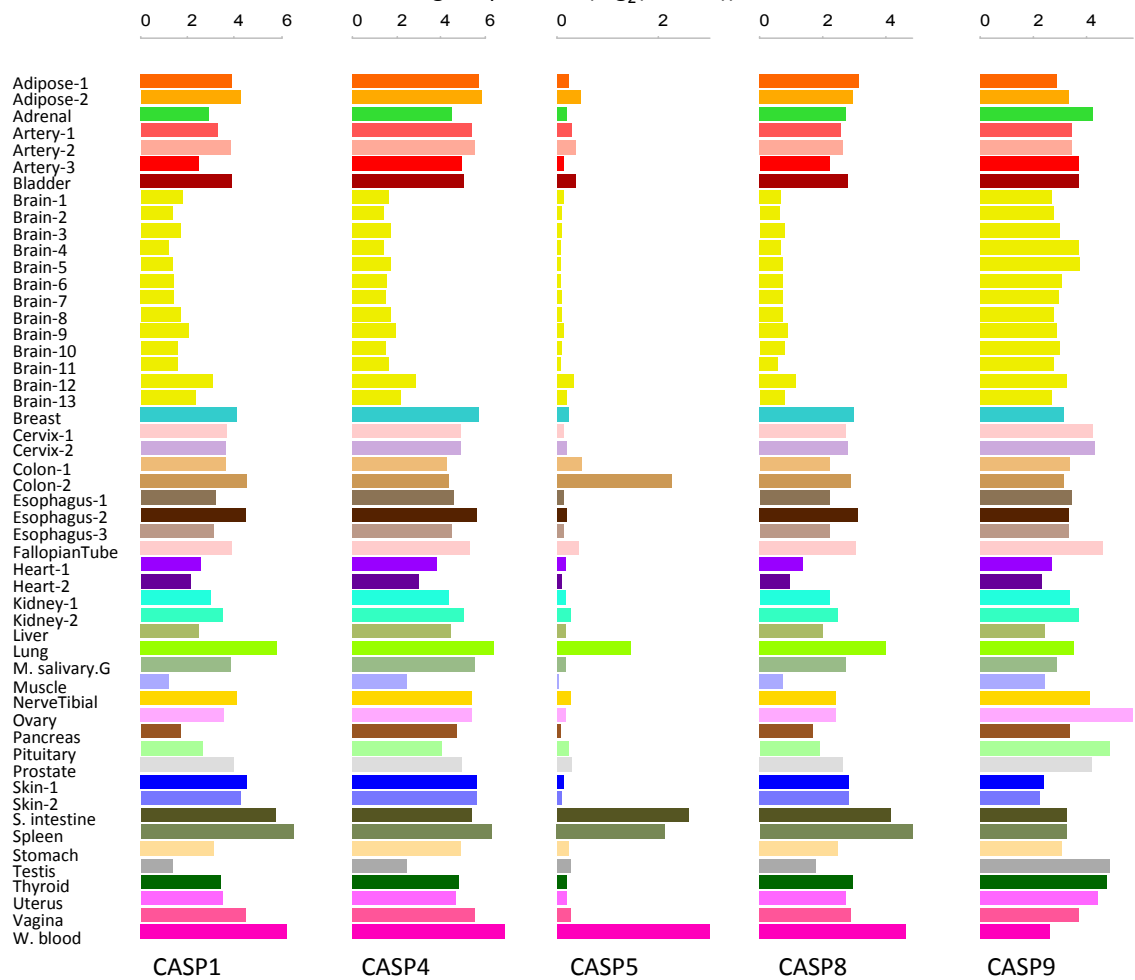

Supplement: mmc1.pdf [file mmc1.pdf]
